# Supplementary material for: 3D interconnected porous carbon derived from spontaneous merging of the nano-sized ZIF-8 polyhedrons for high-mass-loading supercapacitor electrodes
Source: Royal Society of Chemistry journal article supplement (doi:10.1039/d1ta09501c), 2021-12-30
Supplement: d1ta09501c1.pdf [file d1ta09501c1.pdf]

## Supporting Information

### **3D Interconnected Porous Carbon Derived from Spontaneous Merging of the Nano-sized ZIF-8 Polyhedrons for High-Mass-Loading Supercapacitor Electrodes**

Di Geng<sup>a, 1</sup>, Su Zhang<sup>b, 1</sup>, Yuting Jiang<sup>a</sup>, Zimu Jiang<sup>a</sup>, Mengjiao Shi<sup>a</sup>, Jin Chang<sup>a</sup>, Shichuan Liang<sup>a</sup>,  
Mingyi Zhang<sup>c</sup>, Jing Feng<sup>a\*</sup>, Tong Wei<sup>a, d\*</sup>, and Zhuangjun Fan<sup>a, d\*</sup>

<sup>a</sup> Key Laboratory of Superlight Materials and Surface Technology, Ministry of Education; College of Material Science and Chemical Engineering, Harbin Engineering University, Harbin, 150001, P. R. China.

<sup>b</sup> State Key Laboratory of Chemistry and Utilization of Carbon Based Energy Resources; Key Laboratory of Energy Materials Chemistry, Ministry of Education; Key Laboratory of Advanced Functional Materials, Autonomous Region; Institute of Applied Chemistry, College of Chemistry, Xinjiang University, Urumqi, 830046, P. R. China.

<sup>c</sup> Key Laboratory for Photonic and Electronic Bandgap Materials, Ministry of Education, School of Physics and Electronic Engineering, Harbin Normal University, Harbin, 150025, P. R. China.

<sup>d</sup> State Key Laboratory of Heavy Oil Processing, School of Materials Science and Engineering, China University of Petroleum, Qingdao, 266580, P. R. China.

<sup>1</sup> These authors contributed equally to this work.

\* Corresponding author.

E-mail address: fengjing@hrbeu.edu.cn (J. Feng) weitong666@163.com (T. Wei)

fanzhj666@163.com (Z. Fan)

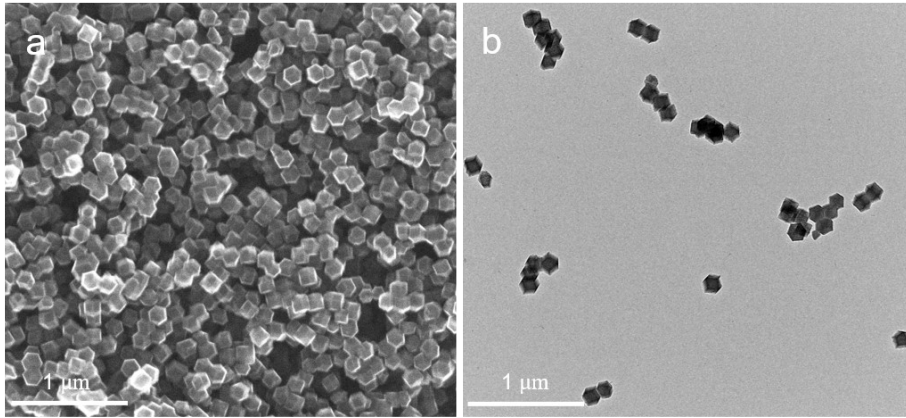

**Figure S1.** a) SEM and b) TEM images of LPC.

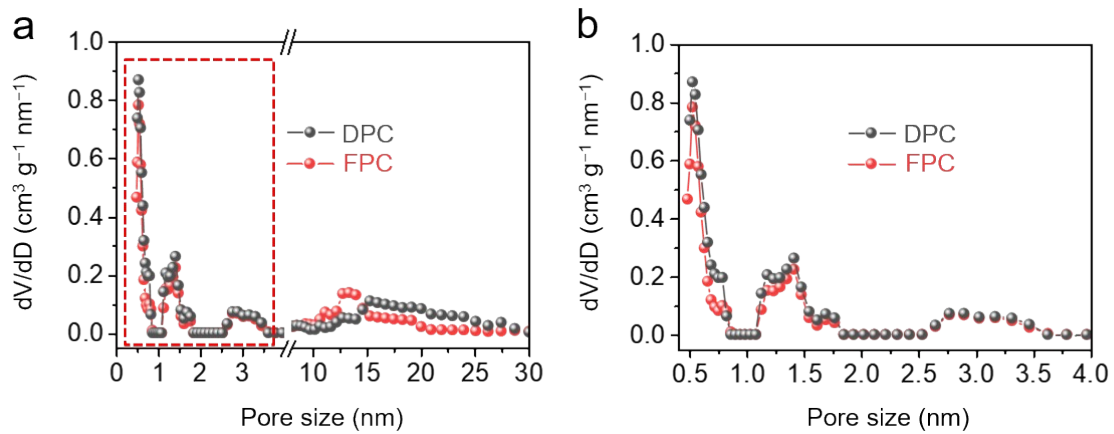

**Figure S2.** a) Pore size distribution and b) magnified micropore size distribution of DPC and FPC.

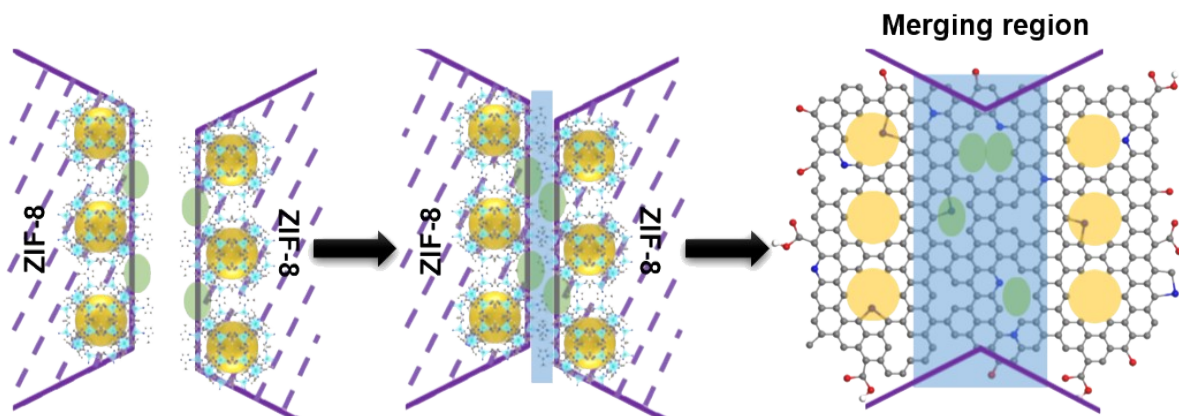

**Figure S3.** Schematic of the merging process.

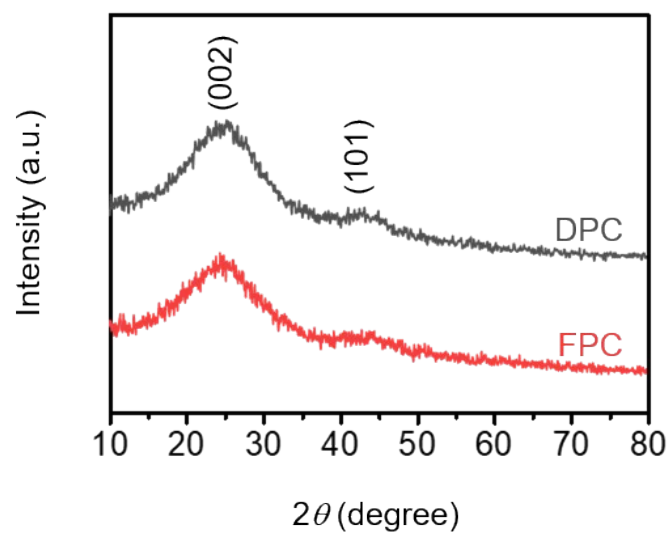

**Figure S4.** XRD patterns of DPC and FPC.

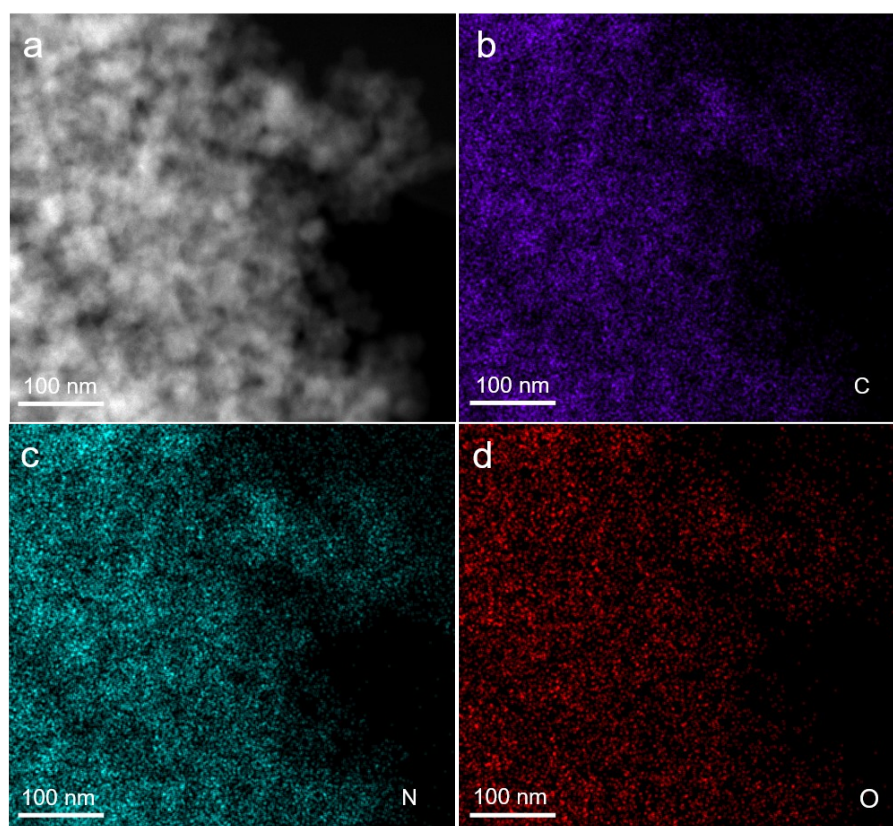

**Figure S5.** HRTEM image of a) DPC and the corresponding elemental mapping images of b) C, c) N, and d) O.

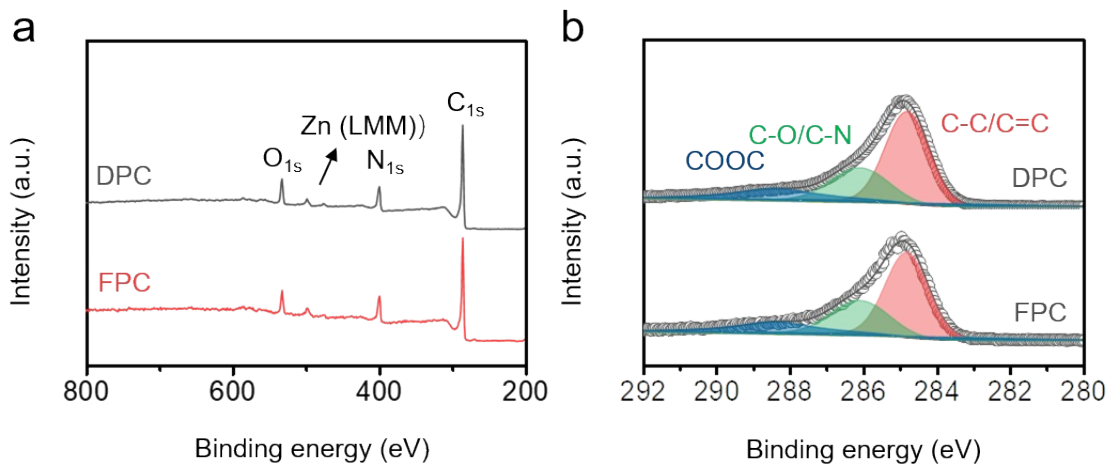

**Figure S6.** a) XPS survey spectra and b) C<sub>1s</sub> spectra of DPC and FPC. The peak located at 495 eV indicates that some Zn species are remained in the internal of samples even after long-time acid washing and purification. However, due to the low content (DPC: 1.2 at.%, FPC: 2.4 at.%), we think that the residual Zn shows almost no influence on the electrochemical performance.

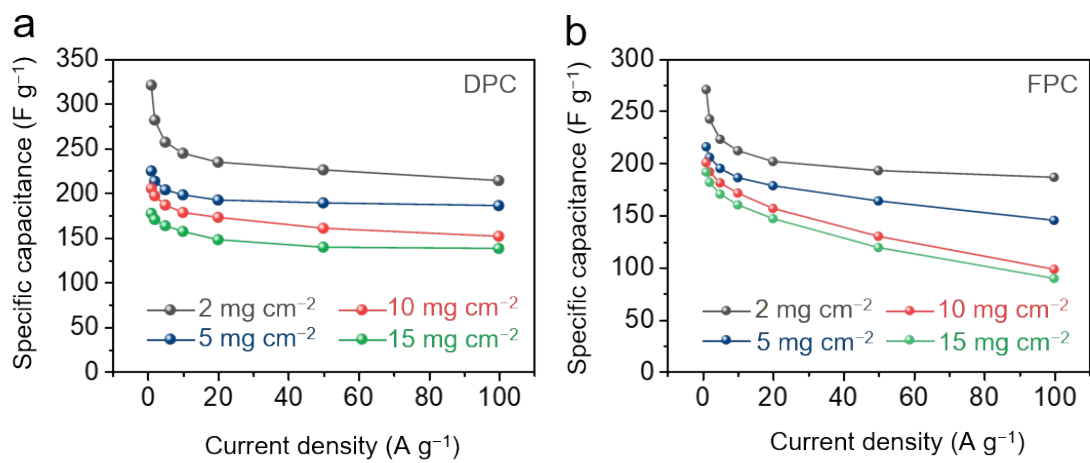

**Figure S7.** Specific capacitances of a) DPC and b) FPC at different current densities.



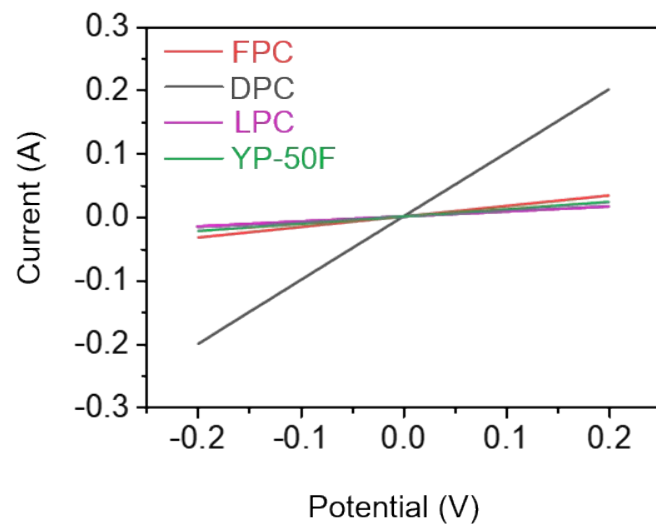

**Figure S8.** The I-V curves of FPC, DPC, LPC, and commercial activated carbon (YP-50F).

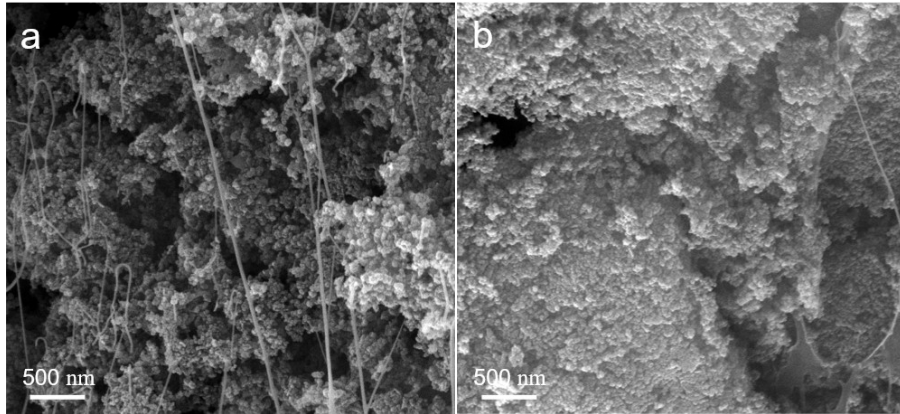

**Figure S9.** SEM images of the cross-section of a) FPC and b) DPC after compression under 10 MPa.

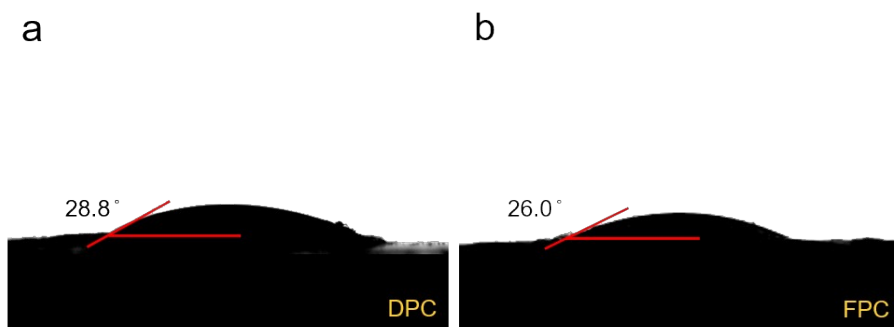

**Figure S10.** Contact angles of a) DPC and b) FPC toward 6 mol L<sup>-1</sup> KOH aqueous electrolyte.

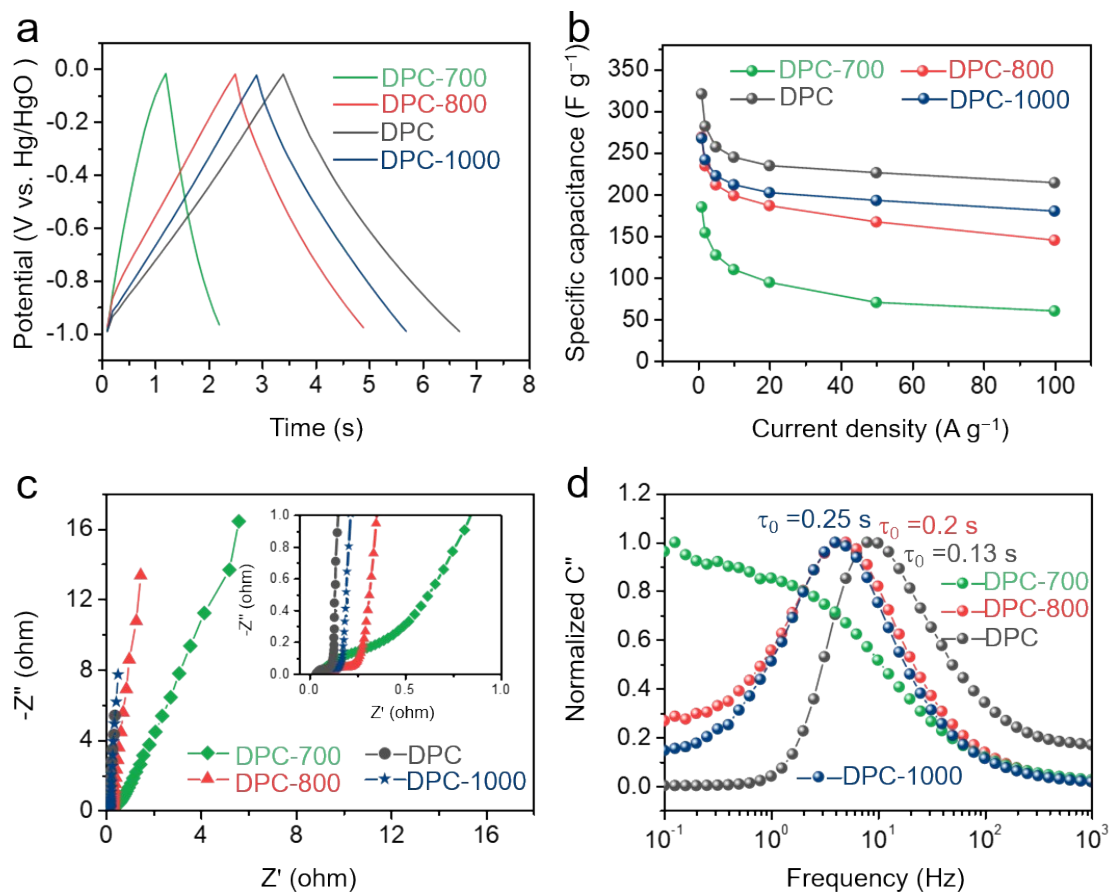

**Figure S11.** The electrochemical performance of DPC-700, DPC-800, DPC, and DPC-1000

samples measured by three-electrode system: a) GCD curves at 50 A g<sup>-1</sup>, b) specific capacitances at different current densities, c) Nyquist plots, and d) normalized C''.

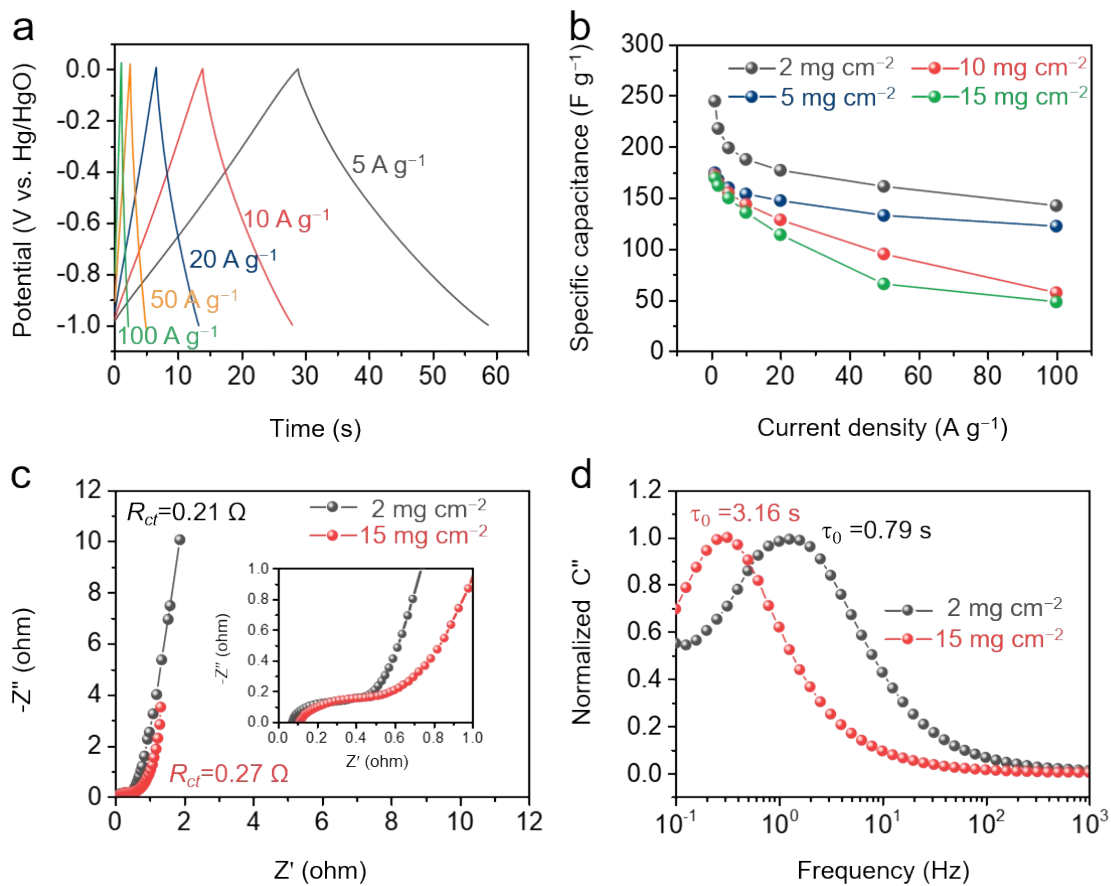

**Figure S12.** The electrochemical performance of LPC measured by three-electrode system: a) GCD curves at different current densities, b) specific capacitances at different current densities, c) Nyquist plots, and d) normalized C''.

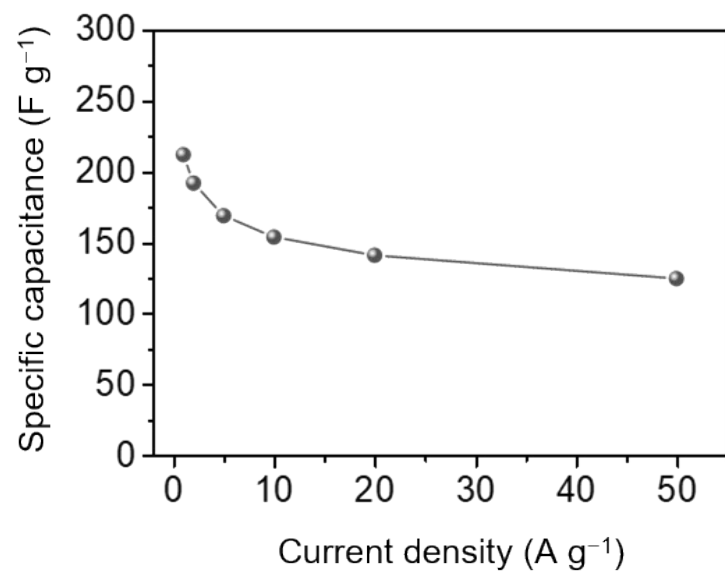

**Figure S13.** The specific capacitance of DPC based on two-electrode supercapacitor assembled using 1 mol L<sup>-1</sup> Na<sub>2</sub>SO<sub>4</sub> electrolyte.

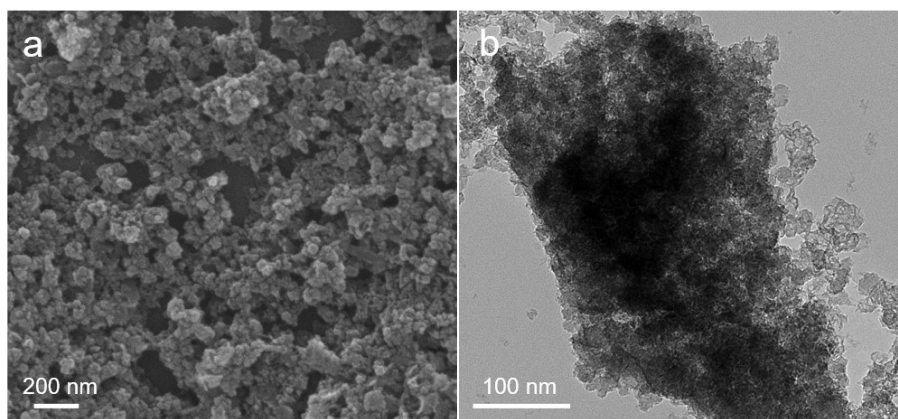

**Figure S14.** a) SEM and b) TEM images of the DPC after 10,000 cycles.

**Table S1.** Performance comparison of heteroatoms doped porous carbon-based materials.

| Precursor  | Carbonization temperature (°C) | Particle size (nm) | Doping elements | N (at%) | O (at%) | Electrolyte                  | Specific capacitance (F g <sup>-1</sup> at X mVs <sup>-1</sup> ) | Specific capacitance (F g <sup>-1</sup> at Y A g <sup>-1</sup> ) | Cycling stability           | Energy density (Wh kg <sup>-1</sup> ) | Power density (kW kg <sup>-1</sup> ) | Ref. |
|------------|--------------------------------|--------------------|-----------------|---------|---------|------------------------------|------------------------------------------------------------------|------------------------------------------------------------------|-----------------------------|---------------------------------------|--------------------------------------|------|
| Zn-ZIF     | 800                            | -                  | N, O            | 12.9    | 6.2     | 6 mol L <sup>-1</sup><br>KOH | -                                                                | 221 (0.5)<br>184 (10)                                            | 10,000<br>cycles            | 22.8                                  | 63.1                                 | S1   |
| ZIF-8      | 950                            | 200-300<br>nm      | N               | -       | -       | 1 mol L <sup>-1</sup><br>KOH | -                                                                | 322(0.5)<br>215 (5)                                              | 10,000<br>cycles            | -                                     | -                                    | S2   |
| ZIF-8      | 800                            | 200-400<br>nm      | N, O            | 20.29   | 6.52    | 6 mol L <sup>-1</sup><br>KOH | -                                                                | 253.6 (1)<br>200.4 (50)                                          | 20,000<br>cycles<br>(92.1%) | 13.33                                 | -                                    | S3   |
| ZIF-8      | 950                            | -                  | N               | 4.5     | -       | 6 mol L <sup>-1</sup><br>KOH | -                                                                | 285.8 (0.1)<br>208 (2)                                           | 1000<br>cycles<br>(97.8%)   | -                                     | -                                    | S4   |
| CNTs/ZIF-8 | 800                            | ca. 20<br>nm       | N               | 4.1     | -       | 6 mol L <sup>-1</sup><br>KOH | -                                                                | 324 (0.5)<br>152 (10)                                            | 1000<br>cycles<br>(93.5 %)  | -                                     | -                                    | S5   |



|                              |      |             |      |       |      |                              |                      |                         |                             |      |        |            |
|------------------------------|------|-------------|------|-------|------|------------------------------|----------------------|-------------------------|-----------------------------|------|--------|------------|
| <b>ZIF-8/CNT</b>             | 900  | ca. 300 nm  | N, O | 3.9   | 4.8  | 6 mol L <sup>-1</sup><br>KOH | -                    | 340 (2)<br>201 (50)     | 10,000<br>cycles<br>(97.7%) | 21.1 | 5      | <b>S6</b>  |
| <b>ZIF-8/graphene</b>        | 800  | 40~70 nm    | N, O | 18.6  | 3.9  | 6 mol L <sup>-1</sup><br>KOH | -                    | 225 (0.5)<br>181 (20)   | 10,000<br>cycles            | 6.5  | 15.126 | <b>S7</b>  |
| <b>ZIF-8/graphene</b>        | 800  | 500 nm/1 μm | N, O | 13.5  | 10.8 | 6 mol L <sup>-1</sup><br>KOH | -                    | 298 (0.5)               | -                           | 8.7  | 12     | <b>S8</b>  |
| <b>ZIF-8/melamine</b>        | 800  | 300 nm      | N, O | 20.4  | 5.8  | 6 mol L <sup>-1</sup><br>KOH | 376.2 (10)           | 359.1 (1)<br>253.6 (20) | 10,000<br>cycles<br>(98.3%) | 11.4 | 0.4985 | <b>S9</b>  |
| <b>Porous organic silica</b> | 1000 |             | O    | -     | >15  | 6 mol L <sup>-1</sup><br>KOH | -                    | 247 (1)                 | -                           | 4.5  | 1.5    | <b>S10</b> |
| <b>Coal</b>                  | 800  |             | O    | 13.65 | 0.92 | 6 mol L <sup>-1</sup><br>KOH | -                    | 259 (1)<br>198 (20)     | 10,000<br>cycles<br>(94.2%) | 9.6  | 0.25   | <b>S11</b> |
| <b>GO</b>                    | -    |             | O    | -     | >35  | 6 mol L <sup>-1</sup><br>KOH | 353 (2)<br>234 (500) | -                       | 10,000<br>cycles            | 18   | 0.18   | <b>S12</b> |

|                                  |     |              |      |      |      |                              |                          |                          |                             |          |              |                      |
|----------------------------------|-----|--------------|------|------|------|------------------------------|--------------------------|--------------------------|-----------------------------|----------|--------------|----------------------|
| <b>GO</b>                        | -   |              | O    | -    | -    | 6 mol L <sup>-1</sup><br>KOH | -                        | 436 (0.5)<br>261 (50)    | 10,000<br>cycles<br>(94%)   | -        | -            | <b>S13</b>           |
| <b>Alfalal<br/>flower</b>        | 700 |              | O    | -    | 13.5 | 6 mol L <sup>-1</sup><br>KOH |                          | 350.1 (0.5)<br>297 (50)  | -                           | 23.2-28  | 10.3-<br>0.1 | <b>S14</b>           |
| <b>EDTA-3K</b>                   | 700 |              | N, O | 2.12 | 8.11 | 6 mol L <sup>-1</sup><br>KOH | 216.2 (5)<br>182.6 (100) | 213.8 (1)<br>157.6 (20)  | 10,000<br>cycles<br>(73.7%) | -        | -            | <b>S15</b>           |
| <b>Pomelo peel</b>               | 700 |              | N, O | 5.2  | 5.5  | 6 mol L <sup>-1</sup><br>KOH | -                        | 180 (0.5)<br>136 (10)    | 5000<br>cycles<br>(99%)     | -        | -            | <b>S16</b>           |
| <b>Knoevenagel<br/>copolymer</b> | 700 |              | N, O | 3.5  | 9.61 | 6 mol L <sup>-1</sup><br>KOH | -                        | 330 (1)<br>221 (20)      | -                           | 24.9     | 0.18         | <b>S17</b>           |
| <b>Organics</b>                  | 800 |              | N, O | 4.36 | 9.17 | 6 mol L <sup>-1</sup><br>KOH | -                        | 221 (0.5)<br>177 (8)     | -                           | 8.3      | 0.25         | <b>S18</b>           |
| <b>ZIF-8</b>                     | 900 | ca. 76<br>nm | N, O | 14.2 | 8.1  | 6 mol L <sup>-1</sup><br>KOH |                          | 320.7 (1)<br>213.9 (100) | 10,000<br>cycles<br>(100%)  | 7.6-20.6 | 34.3-<br>0.5 | <b>This<br/>work</b> |

|               |   |   |   |   |   |                       |             |   |   |   |             |
|---------------|---|---|---|---|---|-----------------------|-------------|---|---|---|-------------|
| <b>YP-50F</b> | - | - | - | - | - | 6 mol L <sup>-1</sup> | 180.3 (1)   | - | - | - | <b>This</b> |
|               |   |   |   |   |   | KOH                   | 132.2 (100) |   |   |   | <b>work</b> |

---

## Reference

- [S1] J. Wang, J. Tang, B. Ding, Z. Chang, X. Hao, T. Takei, N. Kobayashi, Y. Bando, X. Zhang and Y. Yamauchi, *Small*, 2018, **14**, 1704461.
- [S2] W. Bao, A. K. Mondal, J. Xu, C. Wang, D. Su and G. Wang, *J. Power Sources*, 2016, **325**, 286-291.
- [S3] Z. Li, H. Mi, L. Liu, Z. Bai, J. Zhang, Q. Zhang and J. Qiu, *Carbon*, 2018, **136**, 176-186.
- [S4] S. Zhong, C. Zhan and D. Cao, *Carbon*, 2015, **85**, 51-59.
- [S5] L. Wan, E. Shamsaei, C. D. Easton, D. Yu, Y. Liang, X. Chen, Z. Abbasi, A. Akbari, X. Zhang and H. Wang, *Carbon*, 2017, **121**, 330-336.
- [S6] Y. Liu, G. Li, Z. Chen and X. Peng, *J. Mater. Chem. A*, 2017, **5**, 9775-9784.
- [S7] L. Wang, C. Wang, H. Wang, X. Jiao, Y. Ouyang, X. Xia, W. Lei and Q. Hao, *Electrochim. Acta*, 2018, **289**, 494-502.
- [S8] L. Xin, Q. Liu, J. Liu, R. Chen, R. Li, Z. Li and J. Wang, *Electrochim. Acta*, 2017, **248**, 215-224.
- [S9] C. Cai, Y. Zou, C. Xiang, H. Chu, S. Qiu, Q. Sui, F. Xu, L. Sun and A. Shah, *Appl. Surf. Sci.*, 2018, **440**, 47-54.
- [S10] L. Zhang, X. Shen, K. Ai, X. Cui, H. Wang and W. Zheng, *ACS Appl. Energy Mater.*, 2019, **2**, 7009-7018.
- [S11] D. Dong, Y. Zhang, Y. Xiao, T. Wang, J. Wang and W.-p. Pan, *Appl. Surf. Sci.*, 2020, **529**, 147074.
- [S12] L. Jiang, L. Sheng, C. Long, T. Wei and Z. Fan, *Adv. Energy Mater.*, 2015, **5**, 1500771.
- [S13] Z. Liu, L. Jiang, L. Sheng, Q. Zhou, T. Wei, B. Zhang and Z. Fan, *Adv. Funct. Mater.*, 2018, **28**, 1705258.
- [S14] J. Yan, L. Miao, H. Duan, D. Zhu, Y. Lv, W. Xiong, L. Li, L. Gan and M. Liu, *Electrochim. Acta*, 2020, **358**, 136899.
- [S15] J. Dai, L. Wang, A. Xie, J. He and Y. Yan, *ACS Sustainable Chem. Eng.*, 2020, **8**, 739-748.
- [S16] J. Li, F. Luo, T. Lin, J. Yang, S. Yang, D. He, D. Xiao and W. Liu, *Chem. Phys. Lett.*, 2020, **753**, 137597.

- [S17] X. Qian, L. Miao, J. Jiang, G. Ping, W. Xiong, Y. Lv, Y. Liu, L. Gan, D. Zhu and M. Liu, *Chem. Eng. J.*, 2020, **388**, 124208.
- [S18] S. Meng, Z. Mo, Z. Li, R. Guo and N. Liu, *Mater. Chem. Phys.*, 2020, **246**, 122830.
